# Supplementary material
Source: publisher site journal article supplement (https://www.spandidos-publications.com/3921/downloadSupplementary)

Figure S1. Inhibition of CoREST expression following transfection with siCoREST. Western blotting was performed to determine that CoREST expression was knocked down in the siCoREST group compared with the siNC group. \*\*P<0.01 vs. siNC. CoREST, corepressor element-1 silencing transcription factor; si, small interfering RNA; NC, negative control.

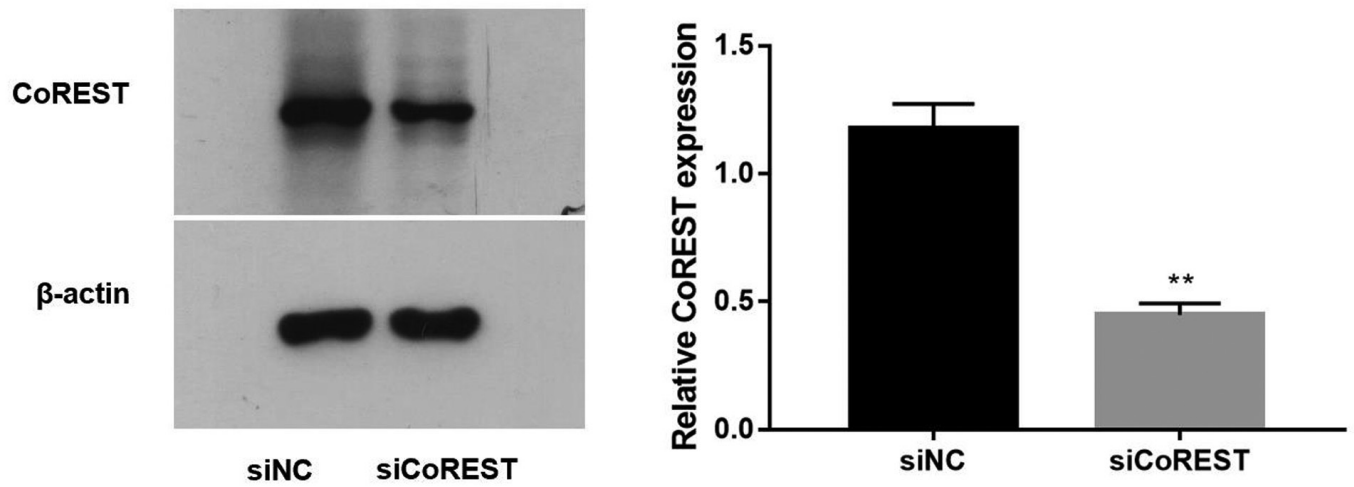

Supplement: Supplementary file 1 [file downloadSupplementary]
